# Supplementary material for: Sensitive and simple sonoluminescence detection of melamine via aggregation of Au nanoparticles
Source: Royal Society of Chemistry journal article supplement (doi:10.1039/c5ay00966a), 2015-01-01
Supplement: c5ay00966a1.pdf [file c5ay00966a1.pdf]

## **Sensitive and simple sonoluminescent detection of melamine via aggregation of Au nanoparticles**

**Jing Liu,<sup>a</sup> Shaohong Feng,<sup>a</sup> Yun Shi,<sup>a</sup> Jitong Lyu<sup>b</sup> and Jiagen Lv<sup>\*a</sup>**

<sup>a</sup> Key Laboratory of Analytical Chemistry for Life Science of Shaanxi Province,  
School of Chemistry and Chemical Engineering, Shaanxi Normal University, Xi'an,  
710119, P. R. China. fax: +86 29 81530727, tel: +86 29 81530726, E-mail:  
lvjiagen@snnu.edu.cn

<sup>b</sup> College of Chemical Engineering, Beijing University of Chemical Technology,  
Beijing 100029, P. R. China.

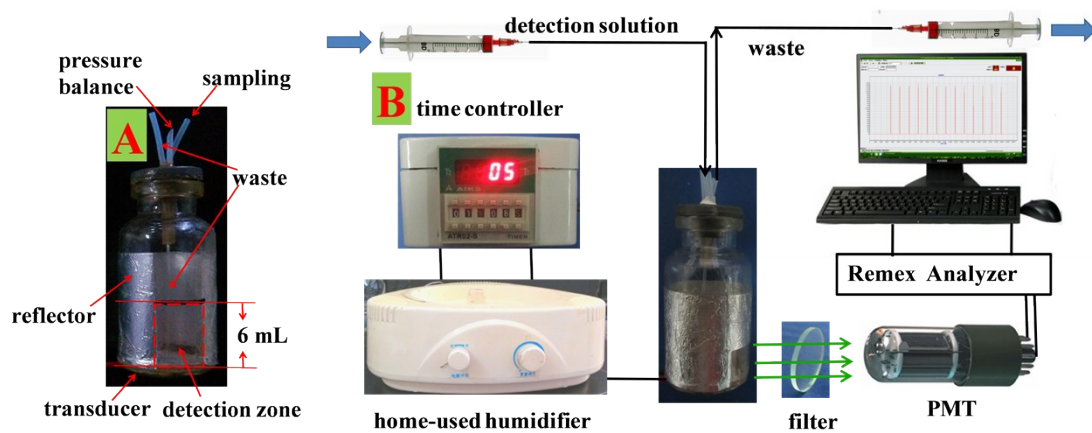

**Fig. S1** The schematic diagrams of (A) the SL vial and (B) the SL system. The ceramic transducer was glued to glass vial with epoxy resin; SL vial, filter, and PMT are included in a darkbox.

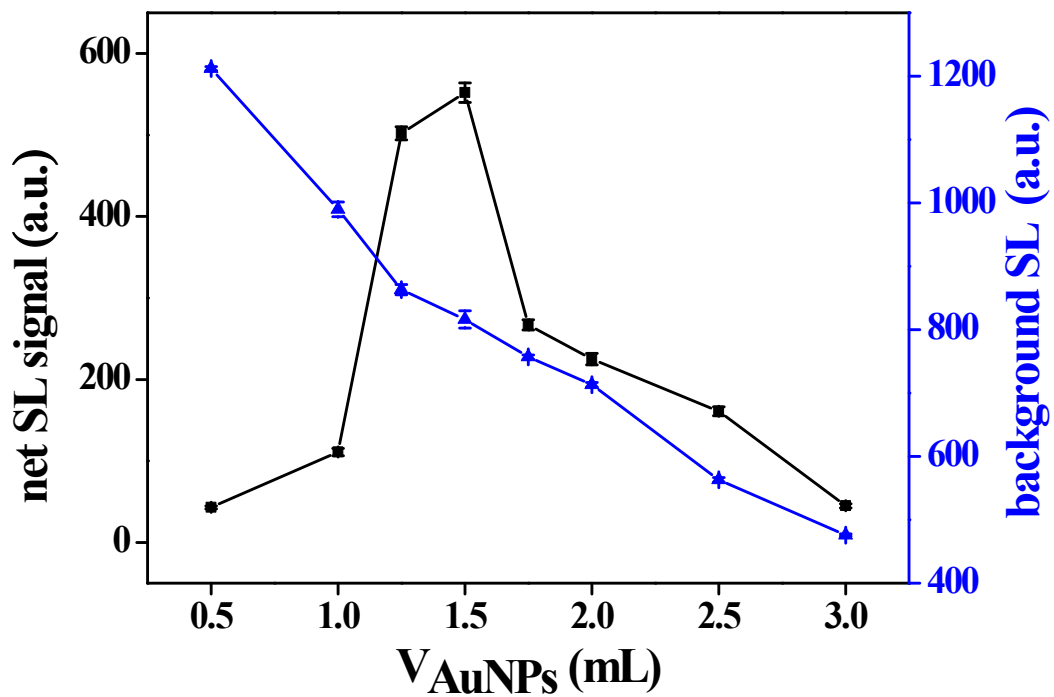

**Fig. S2** The effect of AuNPs contents on SL response to 1.0  $\mu$ M melamine; interaction time, 5min; ultrasound irradiating duration, 0.1 s; irradiating interval, 8 s; volume of detection solution, 6 mL; PMT biased at -700V.

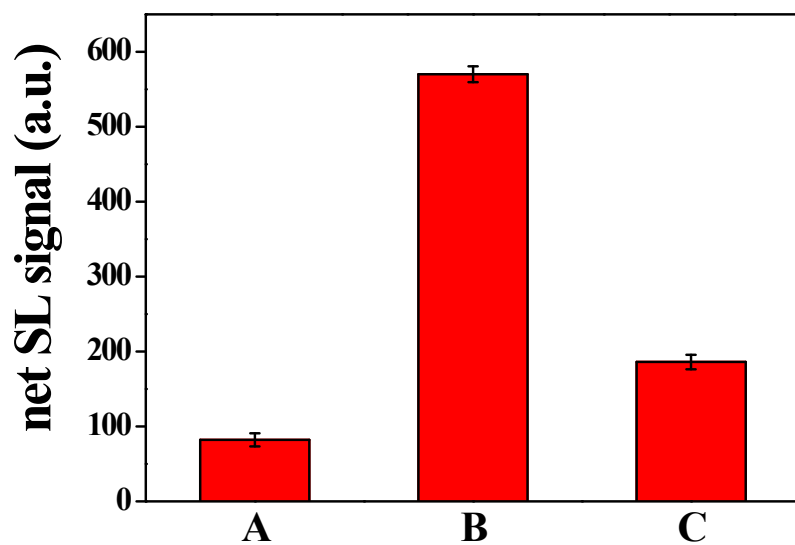

**Fig. S3** The effects of mixing order on SL detection. A. AuNPs + water, then the addition of melamine; B. AuNPs + melamine, then the addition of water; C. water + melamine, then the addition of AuNPs. Melamine, 1.0  $\mu\text{M}$ ; AuNPs, 1.5 mL; interaction time, 5 min; ultrasound irradiating duration, 0.1 s; interval, 8 s; detection solution volume, 6 mL; PMT biased at -700V.

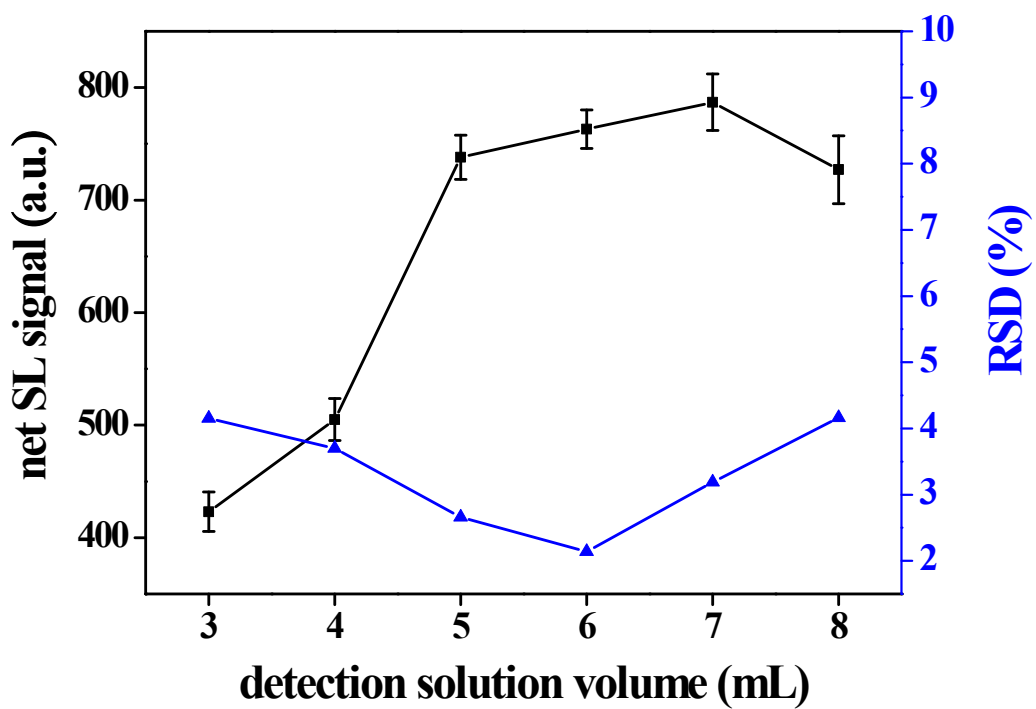

**Fig. S4** The effect of detection solution volume on SL response to 1.0  $\mu\text{M}$  melamine; interaction time, 5min; ultrasound irradiating duration, 0.1 s; irradiating interval, 8 s; PMT biased at -700V.
